# Supplementary material
Source: Research Square preprint supplement (doi:10.21203/rs.3.rs-9877671/v1)
Supplement: Supplementary file 1 [file 657b43c9d94efbc1453947f5.docx]

**Table 1. Comparison of performance between the ureteral orifice recognition AI and the urologist baseline**

| Evaluator | F1-score | Accuracy | Precision | FPR | FNR | MSR |
| --- | --- | --- | --- | --- | --- | --- |
| Urologist | 0.64 ± 0.08 | 0.70 ± 0.03 | 0.80 ± 0.11 | 0.17 ± 0.14 | 0.43 ± 0.16 | 0.09 ± 0.07 |
| AI | 0.71 ± 0.19 | 0.81 ± 0.11 | 0.82 ± 0.14 | 0.10 ± 0.09 | 0.36 ± 0.23 | 0.05 ± 0.04 |

The values are presented as the mean ± standard deviation.
For both the AI platform and the urologists, ureteral orifice recognition was considered successful when the center-to-center distance between the predicted box center and the ground-truth center was within 15% of the image height.
AI, artificial intelligence; FPR, false-positive rate; FNR, false-negative rate; MSR, misdisplay rate.
