# Supplementary material
Source: Research Square preprint supplement (doi:10.21203/rs.3.rs-9877671/v1)
Supplement: Supplementary file 2 [file 9a4281cf8553aaaf22f7ad58.docx]

**
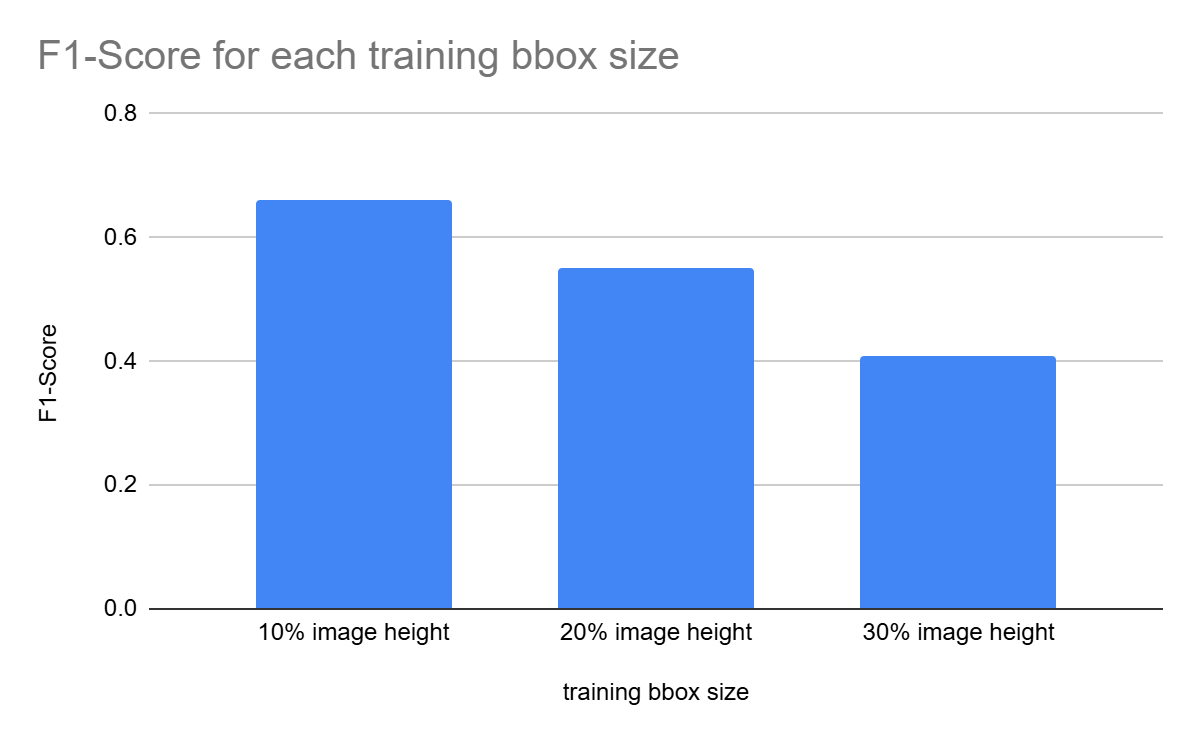
**

**Supplementary Figure 1. Comparison of F1 scores in the development set across candidate pseudobox sizes.**
Pseudobox sizes corresponding to 10%, 20%, and 30% of the image height were evaluated. The highest F1 score was obtained with a pseudobox size of 10% of the image height, which was therefore selected for the final model.
